# Supplementary material
Source: Springer Nature journal article supplement (https://www.springermedizin.de/resource/supplementary/12882_2012_340_MOESM3_ESM.pdf/9453684)

- Developed preliminary list of domains and topics for CER studies

1

- Engaged stakeholders from CKD community to revise preliminary list and rank topics

2

- Assessed feasibility of CER reviews on topic areas

3

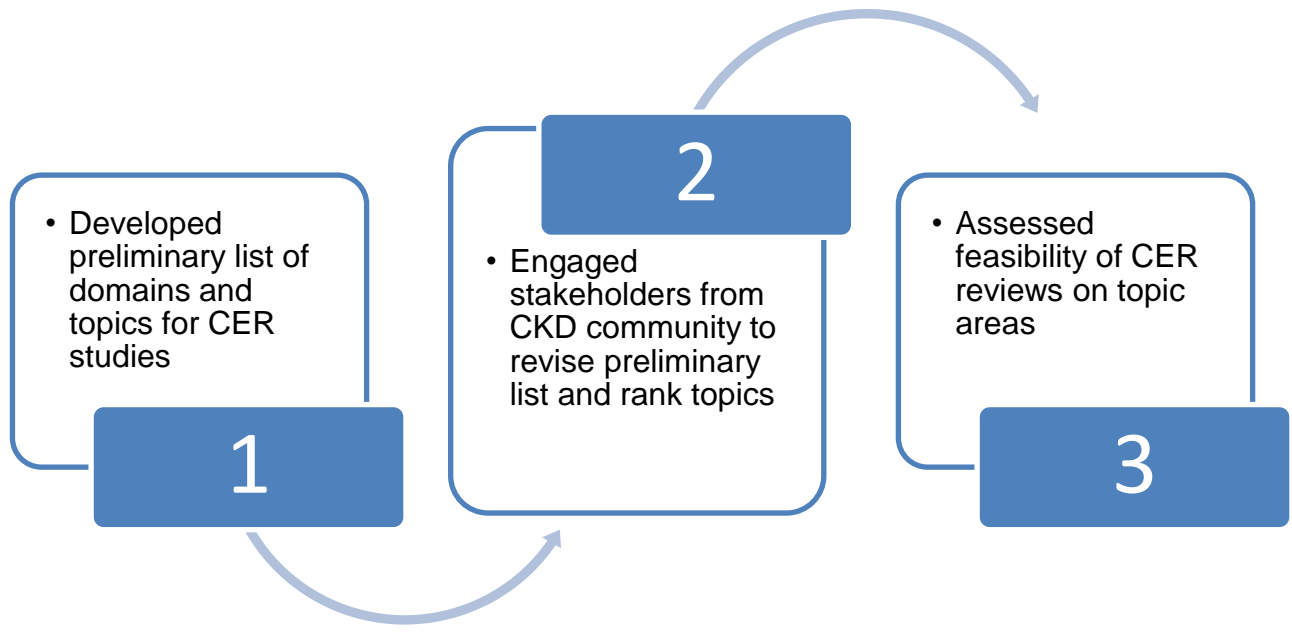

Supplement: MOESM3 [file 9453684]
